# Supplementary material for: Iatrogenic genito-urinary fistula following cesarean birth in nine sub-Saharan African countries: a retrospective review
Source: Springer Nature journal article supplement (doi:10.1186/s12884-022-04774-0), 2022-07-05
Supplement: MOESM1 [file 23240234]

Table S1: Iatrogenic fistula and cesarean births by country

| Country     | Births |         |          |       | Cesarean births resulting in iatrogenic fistula |       |
|-------------|--------|---------|----------|-------|-------------------------------------------------|-------|
|             | Total  | Vaginal | Cesarean |       | N                                               | %     |
|             | N      | N       | N        | %     |                                                 |       |
| Ethiopia    | 89     | 75      | 14       |       | 6                                               |       |
| Kenya       | 868    | 393     | 475      | 54.7% | 137                                             | 28.8% |
| Malawi      | 560    | 239     | 321      | 57.3% | 83                                              | 25.9% |
| Rwanda      | 360    | 168     | 192      | 53.3% | 50                                              | 26.0% |
| Somalia     | 260    | 191     | 69       | 26.5% | 10                                              |       |
| South Sudan | 198    | 122     | 76       | 38.4% | 15                                              |       |
| Tanzania    | 1838   | 869     | 969      | 52.7% | 242                                             | 25.0% |
| Uganda      | 1161   | 420     | 741      | 63.8% | 224                                             | 30.2% |
| Zambia      | 135    | 51      | 84       | 62.2% | 20                                              |       |
| Total       | 5469   | 2528    | 2941     | 53.8% | 787                                             | 26.8% |
